# Supplementary material for: Two-component molecular crystals: evaluation of the formation thermodynamics based on melting points and sublimation data
Source: Royal Society of Chemistry journal article supplement (doi:10.1039/c7ce00554g), 2017-01-01
Supplement: c7ce00554g1.pdf [file c7ce00554g1.pdf]

## SUPPORTING INFORMATION

# Two-component molecular crystals: evaluation of formation thermodynamics based on melting points and sublimation data

**German L. Perlovich**

Department of Physical Chemistry of Drugs, Krestov's Institute of Solution Chemistry, Russian Academy of Sciences, 153045 Akademicheskaya str. 1, Ivanovo, Russia

| CONTENT:                                                                           | Page |
|------------------------------------------------------------------------------------|------|
| <b>Table 1SI.</b> Experimental and calculated data for the co-crystals of Acridine | S2   |

\* To whom correspondence should be addressed:

Telephone: +7-4932-533784; Fax: +7-4932- 336237; E-mail [glp@isc-ras.ru](mailto:glp@isc-ras.ru)

**Table 1SI.** Experimental and calculated data for the co-crystals of Acridine

| API      | CF <sup>a</sup> | Stoich | $T_{fus}^{API}$<br>/ °C | $T_{fus}^{CF}$<br>/ °C | $T_{fus}^{CC}$<br>/ °C | $\Delta G_{sub}^{API}$<br>/ kJ·mol <sup>-1</sup> | $\Delta H_{sub}^{API}$<br>/ kJ·mol <sup>-1</sup> | $\Delta G_{sub}^{CF}$<br>/ kJ·mol <sup>-1</sup> | $\Delta H_{sub}^{CF}$<br>/ kJ·mol <sup>-1</sup> | $\Delta G_f^{CC}$<br>/ kJ·mol <sup>-1</sup> | $\Delta H_f^{CC}$<br>/ kJ·mol <sup>-1</sup> | $T\Delta S_f^{CC}$<br>/ kJ·mol <sup>-1</sup> |
|----------|-----------------|--------|-------------------------|------------------------|------------------------|--------------------------------------------------|--------------------------------------------------|-------------------------------------------------|-------------------------------------------------|---------------------------------------------|---------------------------------------------|----------------------------------------------|
| Acridine | 4-F-BA          | 1:1    | 100.8                   | 185.0                  | 381.5                  | 40.5                                             | 97.9                                             | 36.8                                            | 93.1                                            | -10.5                                       | -13.6                                       | -3.1                                         |
| Acridine | BA              | 1:1    | 100.8                   | 123.3                  | 94.7                   | 40.5                                             | 97.9                                             | 34.4                                            | 90.5                                            | 4.7                                         | 5.7                                         | 1.0                                          |
| Acridine | 2-F-BA          | 1:1    | 100.8                   | 125.5                  | 99.0                   | 40.5                                             | 97.9                                             | 35.5                                            | 94.4                                            | 2.9                                         | 2.0                                         | -0.9                                         |
| Acridine | 2-Cl-BA         | 1:1    | 100.8                   | 140.8                  | 95.5                   | 40.5                                             | 97.9                                             | 41.0                                            | 101.5                                           | -0.3                                        | -2.3                                        | -2.0                                         |
| Acridine | 2-Br-BA         | 1:1    | 100.8                   | 149.6                  | 93.5                   | 40.5                                             | 97.9                                             | 44.1                                            | 108.5                                           | -2.3                                        | -6.9                                        | -4.5                                         |
| Acridine | 2-I-BA          | 1:1    | 100.8                   | 163.3                  | 99.3                   | 40.5                                             | 97.9                                             | 47.8                                            | 112.8                                           | -3.8                                        | -7.8                                        | -4.0                                         |
| Acridine | 3-F-BA          | 1:1    | 100.8                   | 124.6                  | 122.9                  | 40.5                                             | 97.9                                             | 34.4                                            | 93.6                                            | -2.6                                        | -1.8                                        | 0.8                                          |
| Acridine | 3-Cl-BA         | 1:1    | 100.8                   | 154.8                  | 129.5                  | 40.5                                             | 97.9                                             | 41.0                                            | 100.6                                           | 0.0                                         | 0.1                                         | 0.1                                          |
| Acridine | 3-Br-BA         | 1:1    | 100.8                   | 158.5                  | 137.3                  | 40.5                                             | 97.9                                             | 43.5                                            | 105.9                                           | 0.4                                         | 1.1                                         | 0.7                                          |
| Acridine | 3-I-BA          | 1:1    | 100.8                   | 188.2                  | 140.2                  | 40.5                                             | 97.9                                             | 48.4                                            | 111.1                                           | -0.4                                        | -0.6                                        | -0.3                                         |
| Acridine | Phloroglucinol  | 2:1    | 100.8                   | 216.0                  | 222.0                  | 40.5                                             | 97.9                                             | 69.4                                            | 135.5                                           | 20.8                                        | 27.0                                        | 6.3                                          |

<sup>a</sup> BA – Benzoic Acid;
